# Supplementary material for: Children with Secondary Care Episodes for Otitis Media Have Poor Literacy and Numeracy Outcomes: A Data Linkage Study
Source: MDPI journal article supplement (doi:10.3390/ijerph182010822), 2021-10-15
Supplement: s1 [file s1]

**Supplementary Table S1:** Univariate odds of children scoring below the national benchmarks on Grade 3 numeracy, reading and writing tests associated with OM episodes and covariates<sup>a</sup>.

|                                                  | Numeracy             | Reading              | Writing               |
|--------------------------------------------------|----------------------|----------------------|-----------------------|
|                                                  | OR (95% CI)          | OR (95% CI)          | OR (95% CI)           |
| OM episode                                       |                      |                      |                       |
| No                                               | REF                  | REF                  | REF                   |
| Yes                                              | 1.44 (1.23 to 1.70)* | 1.48 (1.26 to 1.73)* | 1.66 (1.34 to 2.06)*  |
| Child sex                                        |                      |                      |                       |
| Female                                           | REF                  | REF                  | REF                   |
| Male                                             | 1.04 (0.92 to 1.17)  | 1.70 (1.50 to 1.93)* | 2.40 (2.00 to 2.87)*  |
| Child Indigenous status                          |                      |                      |                       |
| Aboriginal/Torres-Strait Islander                | 5.99 (5.07 to 7.08)* | 4.66 (3.94 to 5.51)* | 9.89 (8.06 to 12.14)* |
| Non-Aboriginal                                   | REF                  | REF                  | REF                   |
| Child speaks English as second language          |                      |                      |                       |
| Yes                                              | 2.02 (1.60 to 2.56)* | 1.67 (1.31 to 2.12)* | 2.48 (1.84 to 3.33)*  |
| No                                               | REF                  | REF                  | REF                   |
| Maternal age at cohort member's birth, y         |                      |                      |                       |
| <20                                              | 1.64 (1.34 to 2.00)* | 1.52 (1.24 to 1.87)* | 1.98 (1.54 to 2.54)*  |
| 20-29                                            | REF                  | REF                  | REF                   |
| 30-39                                            | 0.59 (0.51 to 0.68)* | 0.58 (0.50 to 0.67)* | 0.55 (0.45 to 0.67)*  |
| 40+                                              | 0.69 (0.45 to 1.06)  | 0.67 (0.44 to 1.01)  | 0.42 (0.21 to 0.85)*  |
| Paternal age at cohort member's birth, y         |                      |                      |                       |
| <20                                              | 1.82 (1.22 to 2.72)* | 1.71 (1.20 to 2.43)* | 2.16 (1.42 to 3.27)*  |
| 20-29                                            | REF                  | REF                  | REF                   |
| 30-39                                            | 0.63 (0.55 to 0.73)* | 0.63 (0.54 to 0.72)* | 0.55 (0.45 to 0.68)*  |
| 40+                                              | 0.55 (0.43 to 0.71)* | 0.63 (0.49 to 0.81)* | 0.49 (0.34 to 0.69)*  |
| Maternal marital status at cohort member's birth |                      |                      |                       |
| Married                                          | REF                  | REF                  | REF                   |
| Unmarried                                        | 1.65 (1.37 to 2.00)* | 2.02 (1.69 to 2.42)* | 3.08 (2.47 to 3.82)*  |
| Divorced/separated/widowed                       | 2.22 (1.46 to 3.37)* | 1.74 (1.09 to 2.77)* | 2.43 (1.37 to 4.31)*  |
| Parental highest education level                 |                      |                      |                       |
| University                                       | REF                  | REF                  | REF                   |
| Vocational                                       | 2.88 (2.28 to 3.63)* | 2.69 (2.14 to 3.38)* | 2.98 (2.06 to 4.32)*  |
| High-school                                      | 5.35 (4.23 to 6.77)* | 4.90 (3.91 to 6.14)* | 8.06 (5.44 to 11.94)* |
| Total siblings                                   |                      |                      |                       |
| 0                                                | 1.32 (1.07 to 1.63)* | 1.27 (1.03 to 1.57)* | 1.33 (0.98 to 1.79)   |
| 1                                                | REF                  | REF                  | REF                   |
| 2                                                | 1.10 (0.94 to 1.29)  | 1.21 (1.03 to 1.41)* | 1.26 (1.00 to 1.57)*  |
| 3 or more                                        | 2.04 (1.74 to 2.40)* | 2.08 (1.77 to 2.44)* | 2.58 (2.07 to 3.20)*  |
| Percentage of optimum birthweight                |                      |                      |                       |
| Normal (85-114%)                                 | REF                  | REF                  | REF                   |
| Low (< 85%)                                      | 1.42 (1.23 to 1.65)* | 1.37 (1.19 to 1.59)* | 1.60 (1.32 to 1.95)*  |
| High (≥ 115%)                                    | 0.92 (0.73 to 1.16)  | 0.83 (0.65 to 1.05)  | 0.80 (0.57 to 1.12)   |
| Gestational age                                  |                      |                      |                       |
| ≥ 37 weeks                                       | REF                  | REF                  | REF                   |
| 33-36 weeks                                      | 1.30 (1.03 to 1.64)* | 1.25 (0.99 to 1.58)  | 1.19 (0.86 to 1.63)   |
| 29-32 weeks                                      | 2.62 (1.57 to 4.39)* | 1.71 (0.96 to 3.02)  | 3.20 (1.70 to 6.05)*  |
| ≤ 28 weeks                                       | 2.07 (1.01 to 4.24)* | 1.12 (0.47 to 2.62)  | 0.44 (0.10 to 1.93)   |
| Season of birth                                  |                      |                      |                       |
| Spring                                           | REF                  | REF                  | REF                   |

|                                                                                       |                      |                      |                      |
|---------------------------------------------------------------------------------------|----------------------|----------------------|----------------------|
| Summer                                                                                | 1.17 (0.98 to 1.40)  | 1.22 (1.02 to 1.45)* | 0.93 (0.72 to 1.20)  |
| Autumn                                                                                | 1.40 (1.18 to 1.67)* | 1.38 (1.16 to 1.64)* | 1.48 (1.18 to 1.87)* |
| Winter                                                                                | 1.01 (0.84 to 1.21)  | 1.11 (0.93 to 1.33)  | 1.13 (0.88 to 1.46)  |
| Any mental health contact                                                             |                      |                      |                      |
| Yes                                                                                   | 2.48 (1.72 to 3.58)* | 2.09 (1.43 to 3.07)* | 4.63 (3.07 to 6.98)* |
| No                                                                                    | REF                  | REF                  | REF                  |
| Birth defects                                                                         |                      |                      |                      |
| Yes                                                                                   | 1.19 (0.91 to 1.56)  | 0.95 (0.71 to 1.27)  | 1.20 (0.84 to 1.73)  |
| No                                                                                    | REF                  | REF                  | REF                  |
| Developmentally vulnerable/at-risk (Australian Early Development Census) <sup>b</sup> |                      |                      |                      |
| Physical health & wellbeing                                                           | 3.14 (2.68 to 3.68)* | 3.00 (2.56 to 3.51)* | 4.12 (3.37 to 5.04)* |
| Social competence                                                                     | 3.68 (3.09 to 4.39)* | 3.36 (2.82 to 4.00)* | 5.56 (4.47 to 6.92)* |
| Emotional maturity                                                                    | 2.65 (2.23 to 3.15)* | 2.66 (2.25 to 3.15)* | 4.09 (3.31 to 5.04)* |
| Communication skills & general knowledge                                              | 4.13 (3.49 to 4.89)* | 4.12 (3.49 to 4.87)* | 5.64 (4.56 to 6.97)* |
| Language & cognitive skills (school based)                                            | 6.45 (5.59 to 7.45)* | 5.25 (4.55 to 6.06)* | 8.09 (6.71 to 9.76)* |
| Area-level socioeconomic disadvantage                                                 |                      |                      |                      |
| Most disadvantaged                                                                    | 3.71 (2.74 to 5.04)* | 3.84 (2.93 to 5.04)* | 4.28 (2.81 to 6.52)* |
| 2                                                                                     | 2.79 (2.06 to 3.79)* | 2.81 (2.13 to 3.71)* | 3.19 (2.11 to 4.83)* |
| 3                                                                                     | 2.29 (1.64 to 3.18)* | 2.38 (1.79 to 3.16)* | 1.77 (1.14 to 2.74)* |
| 4                                                                                     | 1.64 (1.20 to 2.25)* | 1.41 (1.05 to 1.89)* | 1.56 (1.01 to 2.41)* |
| Least disadvantaged                                                                   | REF                  | REF                  | REF                  |
| Geographic remoteness                                                                 |                      |                      |                      |
| Metropolitan                                                                          | REF                  | REF                  | REF                  |
| Regional                                                                              | 1.42 (1.18 to 1.69)* | 1.40 (1.14 to 1.72)* | 1.54 (1.19 to 1.99)* |
| Remote                                                                                | 2.39 (1.80 to 3.18)* | 2.84 (2.19 to 3.70)* | 4.46 (3.07 to 6.47)* |

OM=Otitis Media, REF= Reference category, OR= Odds Ratio, CI = Confidence Interval

<sup>a</sup> All variables were entered into separate models. <sup>b</sup> Reference category for all Australian Early Development Census Domains is 'on-track'.

\* $p < .05$

**Supplementary Table S2:** Multivariate odds of children scoring below the national benchmarks on Grade 3 numeracy, reading and writing tests associated with OM episodes and covariates.

|                                                  | Numeracy             | Reading              | Writing              |
|--------------------------------------------------|----------------------|----------------------|----------------------|
|                                                  | OR (95% CI)          | OR (95% CI)          | OR (95% CI)          |
| OM episode                                       |                      |                      |                      |
| No                                               | REF                  | REF                  | REF                  |
| Yes                                              | 1.33 (1.12 to 1.58)* | 1.35 (1.14 to 1.59)* | 1.43 (1.13 to 1.81)* |
| Child sex                                        |                      |                      |                      |
| Female                                           | REF                  | REF                  | REF                  |
| Male                                             | 0.88 (0.77 to 1.00)  | 1.54 (1.35 to 1.75)* | 2.16 (1.77 to 2.62)* |
| Child Indigenous status                          |                      |                      |                      |
| Aboriginal/Torres-Strait Islander                | 2.94 (2.44 to 3.54)* | 2.18 (1.81 to 2.63)* | 3.63 (2.85 to 4.63)* |
| Non-Aboriginal                                   | REF                  | REF                  | REF                  |
| Child speaks English as second language          |                      |                      |                      |
| Yes                                              | 1.23 (0.96 to 1.58)  | 0.95 (0.74 to 1.23)  | 1.22 (0.87 to 1.72)  |
| No                                               | REF                  | REF                  | REF                  |
| Maternal age at cohort member's birth, y         |                      |                      |                      |
| <20                                              | 1.64 (1.34 to 2.00)* | 1.52 (1.24 to 1.87)* | 1.98 (1.54 to 2.54)* |
| 20-29                                            | REF                  | REF                  | REF                  |
| 30-39                                            | 0.82 (0.69 to 0.98)* | 0.81 (0.68 to 0.96)* | 0.87 (0.68 to 1.11)  |
| 40+                                              | 0.86 (0.53 to 1.38)  | 0.82 (0.52 to 1.30)  | 0.64 (0.30 to 1.37)  |
| Paternal age at cohort member's birth, y         |                      |                      |                      |
| <20                                              | 1.23 (0.79 to 1.92)  | 1.14 (0.75 to 1.74)  | 1.27 (0.75 to 2.15)  |
| 20-29                                            | REF                  | REF                  | REF                  |
| 30-39                                            | 0.90 (0.75 to 1.07)  | 0.91 (0.76 to 1.08)  | 0.88 (0.69 to 1.12)  |
| 40+                                              | 0.83 (0.62 to 1.11)  | 0.99 (0.74 to 1.33)  | 0.94 (0.62 to 1.41)  |
| Maternal marital status at cohort member's birth |                      |                      |                      |
| Married                                          | REF                  | REF                  | REF                  |
| Unmarried                                        | 0.88 (0.71 to 1.08)  | 1.21 (0.99 to 1.49)  | 1.64 (1.27 to 2.11)* |
| Divorced/separated/<br>widowed                   | 1.56 (1.01 to 2.42)* | 1.20 (0.75 to 1.90)  | 1.56 (0.86 to 2.82)  |
| Parental highest education level                 |                      |                      |                      |
| University                                       | REF                  | REF                  | REF                  |
| Vocational                                       | 2.17 (1.72 to 2.74)* | 2.01 (1.60 to 2.52)* | 1.99 (1.31 to 3.01)* |
| High-school                                      | 2.79 (2.18 to 3.59)* | 2.59 (2.03 to 3.29)* | 3.29 (2.10 to 5.13)* |
| Total siblings                                   |                      |                      |                      |
| 0                                                | 1.11 (0.88 to 1.38)  | 1.06 (0.85 to 1.33)  | 1.00 (0.71 to 1.39)  |
| 1                                                | REF                  | REF                  | REF                  |
| 2                                                | 1.01 (0.85 to 1.19)  | 1.11 (0.94 to 1.3)   | 1.12 (0.88 to 1.43)  |
| 3 or more                                        | 1.38 (1.16 to 1.64)* | 1.47 (1.24 to 1.74)* | 1.66 (1.31 to 2.12)* |
| Percentage of optimum birthweight                |                      |                      |                      |
| Normal (85-114%)                                 | REF                  | REF                  | REF                  |
| Low (< 85%)                                      | 1.31 (1.12 to 1.54)* | 1.30 (1.12 to 1.52)* | 1.45 (1.17 to 1.80)* |
| High (≥ 115%)                                    | 1.02 (0.80 to 1.30)  | 0.90 (0.71 to 1.15)  | 0.99 (0.70 to 1.42)  |
| Gestational age                                  |                      |                      |                      |
| ≥ 37 weeks                                       | REF                  | REF                  | REF                  |
| 33-36 weeks                                      | 1.11 (0.86 to 1.42)  | 1.09 (0.86 to 1.39)  | 0.91 (0.64 to 1.30)  |
| 29-32 weeks                                      | 1.51 (0.86 to 2.64)  | 1.00 (0.55 to 1.83)  | 1.70 (0.85 to 3.40)  |
| ≤ 28 weeks                                       | 1.61 (0.75 to 3.46)  | 0.97 (0.40 to 2.34)  | 0.39 (0.08 to 1.80)  |
| Season of birth                                  |                      |                      |                      |

|                                                                                       |                      |                      |                      |
|---------------------------------------------------------------------------------------|----------------------|----------------------|----------------------|
| Spring                                                                                | REF                  | REF                  | REF                  |
| Summer                                                                                | 1.13 (0.94 to 1.36)  | 1.18 (0.98 to 1.41)  | 0.91 (0.70 to 1.20)  |
| Autumn                                                                                | 1.25 (1.04 to 1.50)* | 1.24 (1.04 to 1.49)* | 1.34 (1.04 to 1.73)* |
| Winter                                                                                | 1.03 (0.85 to 1.25)  | 1.13 (0.93 to 1.36)  | 1.19 (0.91 to 1.55)  |
| Any mental health contact                                                             |                      |                      |                      |
| Yes                                                                                   | 1.68 (1.13 to 2.48)* | 1.33 (0.88 to 2.00)  | 2.98 (1.90 to 4.67)* |
| No                                                                                    | REF                  | REF                  | REF                  |
| Birth defects                                                                         |                      |                      |                      |
| Yes                                                                                   | 1.16 (0.88 to 1.55)  | 0.85 (0.63 to 1.15)  | 1.06 (0.71 to 1.58)  |
| No                                                                                    | REF                  | REF                  | REF                  |
| Developmentally vulnerable/at-risk (Australian Early Development Census) <sup>a</sup> |                      |                      |                      |
| Physical health & wellbeing                                                           | 1.26 (1.04 to 1.53)* | 1.26 (1.04 to 1.51)* | 1.28 (0.99 to 1.64)  |
| Social competence                                                                     | 1.34 (1.06 to 1.71)* | 1.16 (0.92 to 1.47)  | 1.45 (1.07 to 1.96)* |
| Emotional maturity                                                                    | 1.14 (0.91 to 1.43)  | 1.20 (0.97 to 1.49)  | 1.33 (1.01 to 1.75)* |
| Communication skills & general knowledge                                              | 1.23 (1.00 to 1.53)  | 1.42 (1.15 to 1.75)* | 1.39 (1.05 to 1.83)* |
| Language & cognitive skills (school based)                                            | 3.42 (2.87 to 4.07)* | 2.53 (2.13 to 3.01)* | 2.88 (2.28 to 3.63)* |
| Area-level socioeconomic disadvantage                                                 |                      |                      |                      |
| Most disadvantaged                                                                    | 1.94 (1.42 to 2.67)* | 2.11 (1.6 to 2.79)*  | 1.71 (1.10 to 2.65)* |
| 2                                                                                     | 1.72 (1.26 to 2.34)* | 1.70 (1.29 to 2.25)* | 1.47 (0.96 to 2.26)  |
| 3                                                                                     | 1.63 (1.15 to 2.31)* | 1.69 (1.27 to 2.25)* | 1.03 (0.66 to 1.60)  |
| 4                                                                                     | 1.26 (0.91 to 1.76)  | 1.08 (0.80 to 1.45)  | 0.97 (0.61 to 1.54)  |
| Least disadvantaged                                                                   | REF                  | REF                  | REF                  |
| Geographic remoteness                                                                 |                      |                      |                      |
| Metropolitan                                                                          | REF                  | REF                  | REF                  |
| Regional                                                                              | 1.21 (1.02 to 1.43)* | 1.16 (0.96 to 1.39)  | 1.25 (0.98 to 1.60)  |
| Remote                                                                                | 1.67 (1.27 to 2.22)* | 2.37 (1.87 to 3.00)* | 3.10 (2.27 to 4.25)* |

OM=Otitis Media, REF= Reference category, OR= Odds Ratio, CI = Confidence Interval

<sup>a</sup> Reference category for all Australian Early Development Census Domains is 'on-track'.

\* $p < .05$

**Supplementary Table S3:** Multivariate odds of children scoring below the national benchmarks on Grade 3 numeracy, reading and writing tests. Separate models for Aboriginal and non-Aboriginal children.

|                                                  | Numeracy             |                      | Reading              |                      | Writing              |                      |
|--------------------------------------------------|----------------------|----------------------|----------------------|----------------------|----------------------|----------------------|
|                                                  | OR (95% CI)          |                      | OR (95% CI)          |                      | OR (95% CI)          |                      |
|                                                  | Aboriginal           | Non-Aboriginal       | Aboriginal           | Non-Aboriginal       | Aboriginal           | Non-Aboriginal       |
| OM episode                                       |                      |                      |                      |                      |                      |                      |
| No                                               | REF                  | REF                  | REF                  | REF                  | REF                  | REF                  |
| Yes                                              | 1.70 (1.22 to 2.37)* | 1.20 (0.98 to 1.47)  | 1.46 (1.02 to 2.09)* | 1.31 (1.08 to 1.59)* | 1.79 (1.23 to 2.60)* | 1.21 (0.89 to 1.66)  |
| Child sex                                        |                      |                      |                      |                      |                      |                      |
| Female                                           | REF                  | REF                  | REF                  | REF                  | REF                  | REF                  |
| Male                                             | 0.86 (0.66 to 1.12)  | 0.88 (0.76 to 1.03)  | 1.96 (1.47 to 2.61)* | 1.45 (1.25 to 1.68)* | 2.31 (1.69 to 3.16)* | 2.16 (1.67 to 2.80)* |
| Child speaks English as second language          |                      |                      |                      |                      |                      |                      |
| Yes                                              | 1.83 (1.23 to 2.71)* | 0.78 (0.55 to 1.11)  | 1.38 (0.89 to 2.14)  | 0.70 (0.47 to 1.03)* | 1.70 (0.99 to 2.90)  | 0.58 (0.30 to 1.09)  |
| No                                               | REF                  | REF                  | REF                  | REF                  | REF                  | REF                  |
| Maternal age at cohort member's birth, y         |                      |                      |                      |                      |                      |                      |
| <20                                              | 0.85 (0.56 to 1.29)  | 1.09 (0.76 to 1.57)  | 0.98 (0.63 to 1.54)  | 0.83 (0.58 to 1.18)  | 0.80 (0.51 to 1.28)  | 0.93 (0.55 to 1.56)  |
| 20-29                                            | REF                  | REF                  | REF                  | REF                  | REF                  | REF                  |
| 30-39                                            | 0.79 (0.53 to 1.19)  | 0.83 (0.69 to 1.01)  | 0.86 (0.53 to 1.37)  | 0.81 (0.67 to 0.97)* | 0.89 (0.56 to 1.44)  | 0.89 (0.65 to 1.21)  |
| 40+                                              | 0.67 (0.15 to 2.92)  | 0.87 (0.52 to 1.45)  | 0.51 (0.09 to 2.86)  | 0.82 (0.50 to 1.33)  | 2.23 (0.50 to 9.98)  | 0.38 (0.14 to 1.04)  |
| Paternal age at cohort member's birth, y         |                      |                      |                      |                      |                      |                      |
| <20                                              | 1.64 (0.85 to 3.15)  | 0.89 (0.48 to 1.65)  | 1.12 (0.60 to 2.11)  | 1.09 (0.64 to 1.88)  | 1.81 (0.98 to 3.35)  | 0.76 (0.34 to 1.71)  |
| 20-29                                            | REF                  | REF                  | REF                  | REF                  | REF                  | REF                  |
| 30-39                                            | 0.86 (0.59 to 1.24)  | 0.95 (0.78 to 1.16)  | 0.91 (0.53 to 1.55)  | 0.94 (0.77 to 1.14)  | 1.24 (0.78 to 1.98)  | 0.82 (0.60 to 1.12)  |
| 40+                                              | 0.72 (0.34 to 1.54)  | 0.89 (0.64 to 1.23)  | 0.60 (0.23 to 1.53)  | 1.10 (0.80 to 1.50)  | 1.24 (0.78 to 1.98)  | 1.19 (0.72 to 1.96)  |
| Maternal marital status at cohort member's birth |                      |                      |                      |                      |                      |                      |
| Married                                          | REF                  | REF                  | REF                  | REF                  | REF                  | REF                  |
| Unmarried                                        | 1.01 (0.73 to 1.40)  | 0.84 (0.64 to 1.11)  | 1.13 (0.80 to 1.61)  | 1.26 (0.98 to 1.63)  | 1.20 (0.83 to 1.73)  | 2.13 (1.52 to 2.98)* |
| Divorced/separated/<br>widowed                   | 1.51 (0.68 to 3.32)  | 1.55 (0.92 to 2.63)  | 1.02 (0.43 to 2.39)  | 1.24 (0.71 to 2.15)  | 1.34 (0.55 to 3.25)  | 1.69 (0.77 to 3.74)  |
| Parental highest education level                 |                      |                      |                      |                      |                      |                      |
| University                                       | REF                  | REF                  | REF                  | REF                  | REF                  | REF                  |
| Vocational                                       | 1.11 (0.42 to 2.94)  | 2.37 (1.81 to 3.10)* | 1.42 (0.58 to 3.52)  | 2.06 (1.62 to 2.61)* | 1.46 (0.51 to 4.20)  | 2.07 (1.28 to 3.36)* |
| High-school                                      | 1.89 (0.98 to 3.62)  | 2.84 (2.16 to 3.72)* | 1.62 (0.77 to 3.42)  | 2.76 (2.15 to 3.53)* | 3.12 (1.10 to 8.88)* | 2.95 (1.73 to 5.03)* |

|                                                                                       | Numeracy             |                      | Reading              |                      | Writing              |                      |
|---------------------------------------------------------------------------------------|----------------------|----------------------|----------------------|----------------------|----------------------|----------------------|
|                                                                                       | OR (95% CI)          |                      | OR (95% CI)          |                      | OR (95% CI)          |                      |
|                                                                                       | Aboriginal           | Non-Aboriginal       | Aboriginal           | Non-Aboriginal       | Aboriginal           | Non-Aboriginal       |
| Total siblings                                                                        |                      |                      |                      |                      |                      |                      |
| 0                                                                                     | 1.04 (0.62 to 1.75)  | 1.15 (0.89 to 1.47)  | 1.77 (1.02 to 3.07)* | 0.94 (0.73 to 1.22)  | 1.26 (0.70 to 2.25)  | 0.87 (0.57 to 1.33)  |
| 1                                                                                     | REF                  | REF                  | REF                  | REF                  | REF                  | REF                  |
| 2                                                                                     | 1.30 (0.87 to 1.93)  | 0.96 (0.80 to 1.16)  | 1.59 (1.03 to 2.45)* | 1.04 (0.87 to 1.24)  | 1.14 (0.72 to 1.79)  | 1.11 (0.83 to 1.48)  |
| 3 or more                                                                             | 1.71 (1.19 to 2.45)* | 1.31 (1.07 to 1.61)* | 1.87 (1.26 to 2.78)* | 1.45 (1.20 to 1.76)* | 1.33 (0.88 to 2.02)  | 1.96 (1.45 to 2.64)* |
| Percentage of optimum birthweight                                                     |                      |                      |                      |                      |                      |                      |
| Normal (85-114%)                                                                      | REF                  | REF                  | REF                  | REF                  | REF                  | REF                  |
| Low (< 85%)                                                                           | 1.72 (1.28 to 2.32)* | 1.17 (0.96 to 1.41)  | 1.23 (0.89 to 1.70)  | 1.33 (1.11 to 1.59)* | 1.48 (1.05 to 2.08)* | 1.44 (1.09 to 1.9)*  |
| High (≥ 115%)                                                                         | 1.26 (0.74 to 2.15)  | 0.97 (0.74 to 1.27)  | 0.98 (0.54 to 1.76)  | 0.88 (0.67 to 1.16)  | 1.42 (0.78 to 2.61)  | 0.84 (0.53 to 1.33)  |
| Gestational age                                                                       |                      |                      |                      |                      |                      |                      |
| ≥ 37 weeks                                                                            | REF                  | REF                  | REF                  | REF                  | REF                  | REF                  |
| 33-36 weeks                                                                           | 1.09 (0.69 to 1.70)  | 1.12 (0.83 to 1.51)  | 1.25 (0.77 to 2.01)  | 1.06 (0.79 to 1.41)  | †                    | 0.90 (0.56 to 1.46)  |
| 29-32 weeks                                                                           | 0.89 (0.32 to 2.47)  | 1.77 (0.92 to 3.40)  | 1.33 (0.45 to 3.96)  | 0.79 (0.36 to 1.73)  | †                    | 1.40 (0.55 to 3.56)  |
| ≤ 28 weeks                                                                            | 0.61 (0.14 to 2.71)  | 2.65 (1.14 to 6.15)* | 2.04 (0.48 to 8.62)  | 0.77 (0.23 to 2.61)  | †                    | 1.11 (0.23 to 5.45)  |
| Season of birth                                                                       |                      |                      |                      |                      |                      |                      |
| Spring                                                                                | REF                  | REF                  | REF                  | REF                  | REF                  | REF                  |
| Summer                                                                                | 1.02 (0.70 to 1.47)  | 1.18 (0.95 to 1.47)  | 0.79 (0.53 to 1.16)  | 1.32 (1.07 to 1.64)* | 0.97 (0.63 to 1.50)  | 0.87 (0.61 to 1.23)  |
| Autumn                                                                                | 1.22 (0.84 to 1.75)  | 1.27 (1.03 to 1.57)* | 0.87 (0.59 to 1.29)  | 1.40 (1.14 to 1.72)* | 1.57 (1.03 to 2.40)* | 1.22 (0.89 to 1.67)  |
| Winter                                                                                | 1.05 (0.72 to 1.55)  | 1.07 (0.85 to 1.34)  | 0.82 (0.55 to 1.24)  | 1.27 (1.02 to 1.58)* | 1.37 (0.87 to 2.15)  | 1.14 (0.81 to 1.60)  |
| Any mental health contact                                                             |                      |                      |                      |                      |                      |                      |
| Yes                                                                                   | 0.97 (0.46 to 2.04)  | 1.98 (1.26 to 3.10)* | 0.83 (0.37 to 1.89)  | 1.60 (1.01 to 2.53)* | 2.53 (1.19 to 5.41)* | 3.23 (1.86 to 5.61)* |
| No                                                                                    | REF                  | REF                  | REF                  | REF                  | REF                  | REF                  |
| Birth defects                                                                         |                      |                      |                      |                      |                      |                      |
| Yes                                                                                   | 0.90 (0.45 to 1.84)  | 1.24 (0.91 to 1.69)  | 0.70 (0.32 to 1.53)  | 0.91 (0.66 to 1.26)  | 0.98 (0.44 to 2.18)  | 1.18 (0.75 to 1.88)  |
| No                                                                                    | REF                  | REF                  | REF                  | REF                  | REF                  | REF                  |
| Developmentally vulnerable/at-risk (Australian Early Development Census) <sup>a</sup> |                      |                      |                      |                      |                      |                      |
| Physical health & wellbeing                                                           | 0.94 (0.66 to 1.36)  | 1.36 (1.09 to 1.71)* | 0.86 (0.58 to 1.28)  | 1.38 (1.11 to 1.71)  | 1.16 (0.77 to 1.74)  | 1.24 (0.90 to 1.71)  |
| Social competence                                                                     | 1.36 (0.87 to 2.11)  | 1.39 (1.04 to 1.85)* | 1.08 (0.67 to 1.74)  | 1.20 (0.91 to 1.59)  | 1.47 (0.91 to 2.39)  | 1.44 (0.98 to 2.12)  |

|                                               | Numeracy             |                      | Reading              |                     | Writing             |                     |
|-----------------------------------------------|----------------------|----------------------|----------------------|---------------------|---------------------|---------------------|
|                                               | OR (95% CI)          |                      | OR (95% CI)          |                     | OR (95% CI)         |                     |
|                                               | Aboriginal           | Non-Aboriginal       | Aboriginal           | Non-Aboriginal      | Aboriginal          | Non-Aboriginal      |
| Emotional maturity                            | 1.39 (0.93 to 2.09)  | 1.04 (0.79 to 1.36)  | 1.49 (0.97 to 2.30)  | 1.11 (0.86 to 1.43) | 1.20 (0.77 to 1.89) | 1.33 (0.93 to 1.91) |
| Communication skills<br>& general knowledge   | 1.16 (0.78 to 1.75)  | 1.30 (1.01 to 1.67)* | 2.32 (1.49 to 3.62)* | 1.21 (0.94 to 1.55) | 1.44 (0.91 to 2.28) | 1.41 (0.99 to 2.00) |
| Language & cognitive<br>skills (school based) | 2.47 (1.79 to 3.41)* | 3.99 (3.25 to 4.9)*  | 1.70 (1.19 to 2.42)* | 3.04 (2.49, 3.71)*  | 1.75 (1.21, 2.52)*  | 4.16 (3.10, 5.58)*  |
| Area-level socioeconomic disadvantage         |                      |                      |                      |                     |                     |                     |
| Most disadvantaged                            | 1.09 (0.49 to 2.43)  | 2.15 (1.53 to 3.02)* | 1.30 (0.52 to 3.22)  | 2.25 (1.67, 3.04)*  | 1.26 (0.53, 3.02)   | 1.72 (0.98, 3.00)   |
| 2                                             | 1.22 (0.55 to 2.70)  | 1.72 (1.22 to 2.41)* | 0.89 (0.37 to 2.12)  | 1.87 (1.37, 2.54)*  | 1.11 (0.46, 2.72)   | 1.47 (0.85, 2.53)   |
| 3                                             | 0.78 (0.33 to 1.83)  | 1.80 (1.25 to 2.58)* | 1.24 (0.49 to 3.13)  | 1.74 (1.27, 2.37)*  | 1.11 (0.46, 2.72)   | 0.95 (0.54, 1.70)   |
| 4                                             | 0.83 (0.35 to 1.93)  | 1.32 (0.93 to 1.88)  | 0.57 (0.21 to 1.55)  | 1.17 (0.84, 1.63)   | 0.84 (0.31, 2.25)   | 0.95 (0.55, 1.64)   |
| Least disadvantaged                           | REF                  | REF                  | REF                  | REF                 | REF                 | REF                 |
| Geographic remoteness                         |                      |                      |                      |                     |                     |                     |
| Metropolitan                                  | REF                  | REF                  | REF                  | REF                 | REF                 | REF                 |
| Regional                                      | 1.29 (0.89 to 1.87)  | 1.16 (0.95 to 1.43)  | 1.08 (0.70 to 1.66)  | 1.14 (0.93, 1.39)   | 1.19 (0.76, 1.88)   | 1.26 (0.93, 1.70)   |
| Remote                                        | 2.03 (1.38 to 2.98)* | 1.06 (0.70 to 1.59)  | 2.44 (1.49 to 3.99)* | 2.03 (1.49, 2.76)*  | 3.35 (2.02, 5.54)*  | 1.95 (1.17, 3.25)*  |

*Note.* OM=Otitis Media, REF= Reference category, OR= Odds Ratio, CI = Confidence Interval

<sup>a</sup>Reference category for all Australian Early Development Census Domains is 'on-track'

\* $p < 0.05$

†values omitted due to small cell sizes
